# Supplementary material
Source: PubMed Central journal article supplement (PMC2268135)

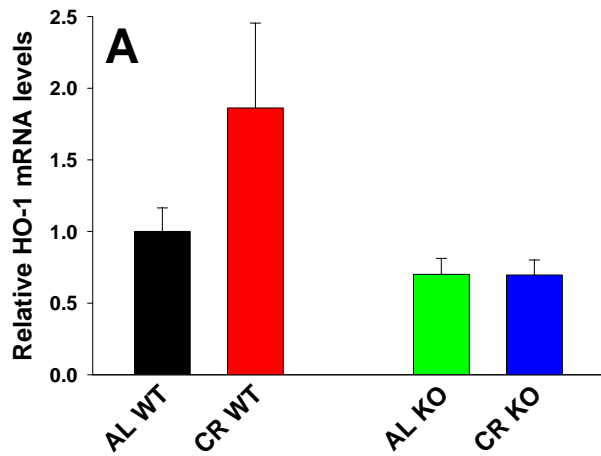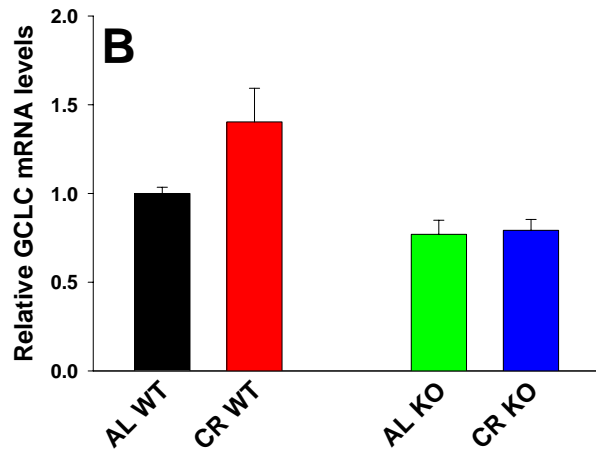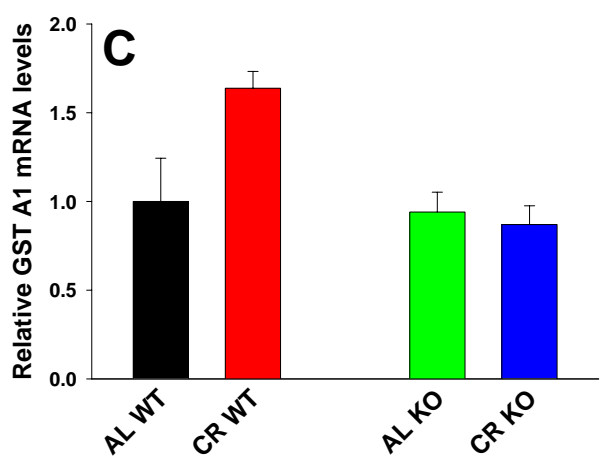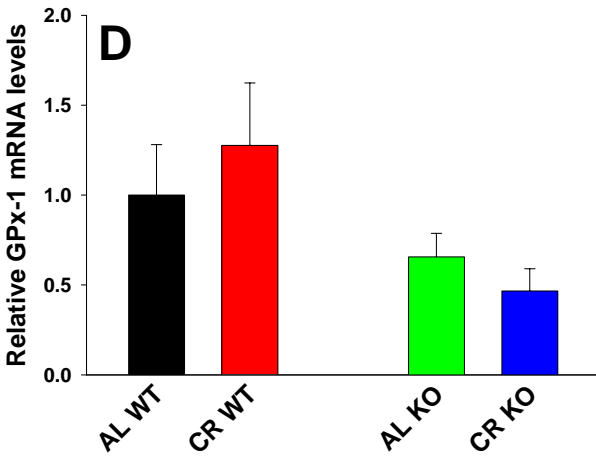

Supplement: supp_0712162105_12162Fig5.pdf [file supp_0712162105_12162Fig5.pdf]

**A**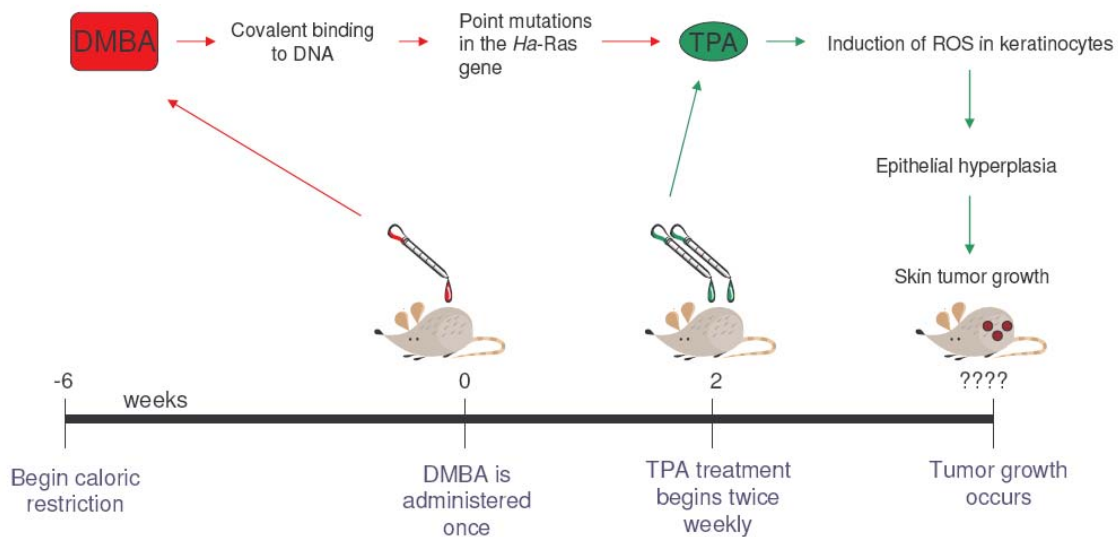**B**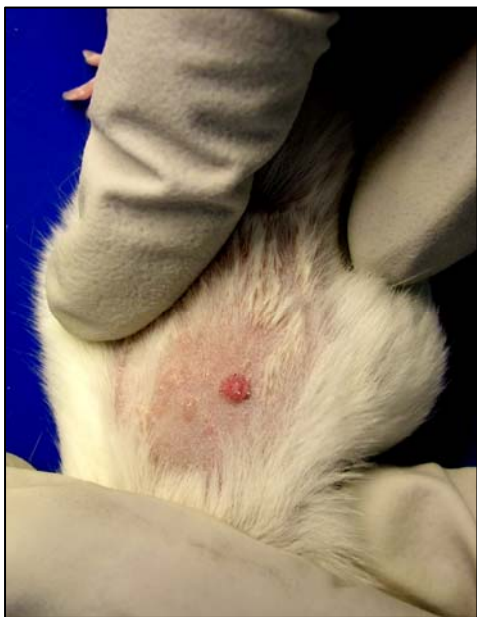**C**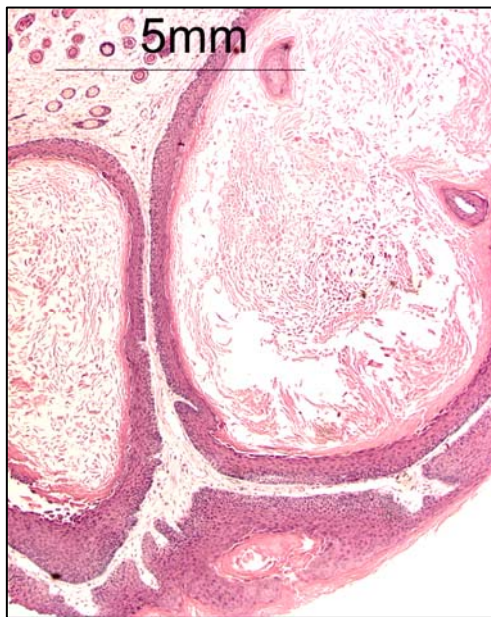

Supplement: supp_0712162105_12162Fig6.pdf [file supp_0712162105_12162Fig6.pdf]

## 40% Restriction

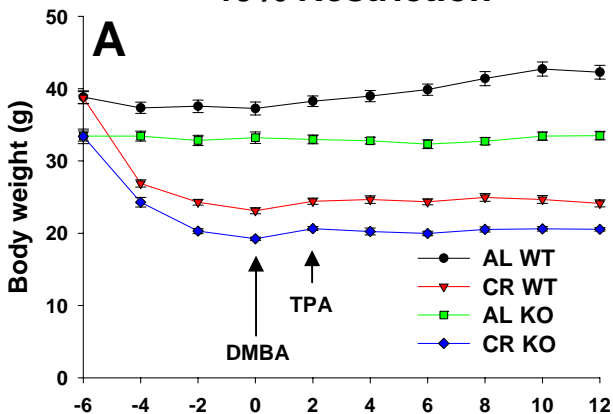

## 30% Restriction

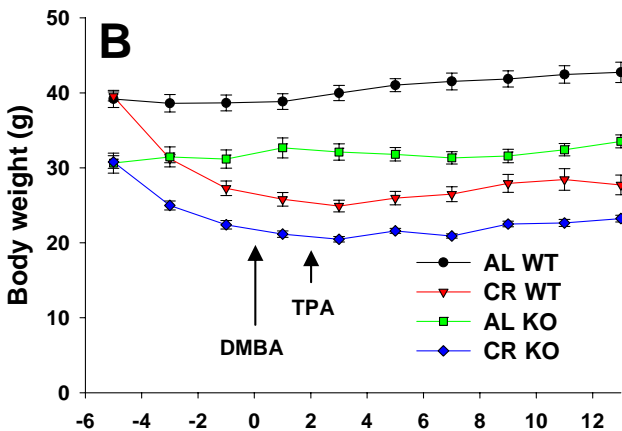

## 20% Restriction

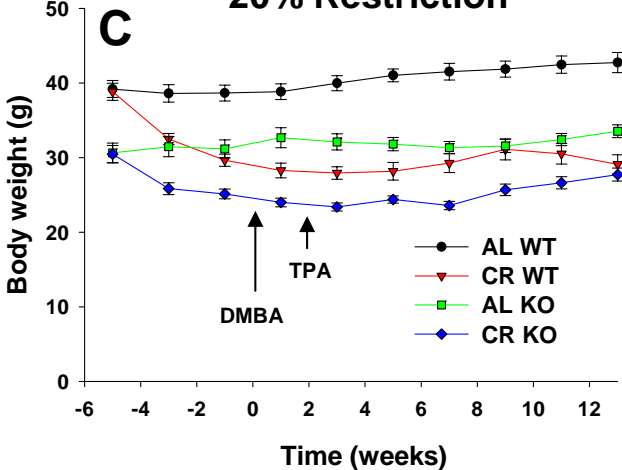

Supplement: supp_0712162105_12162Fig7.pdf [file supp_0712162105_12162Fig7.pdf]

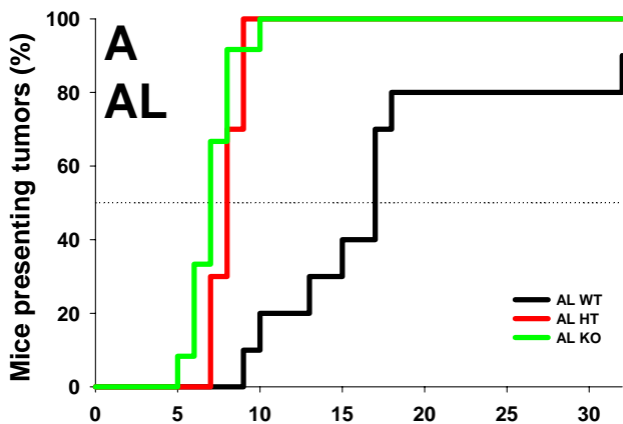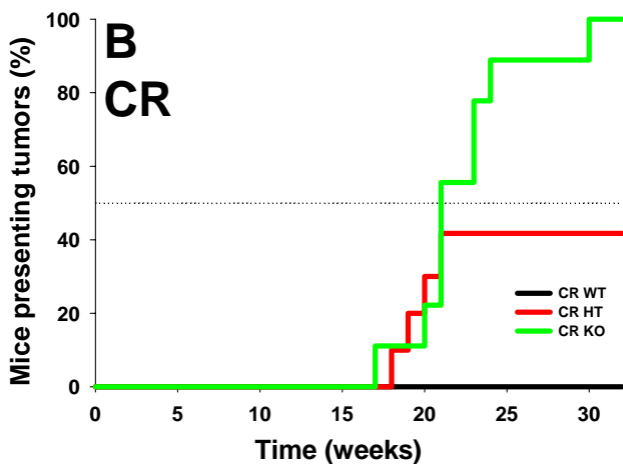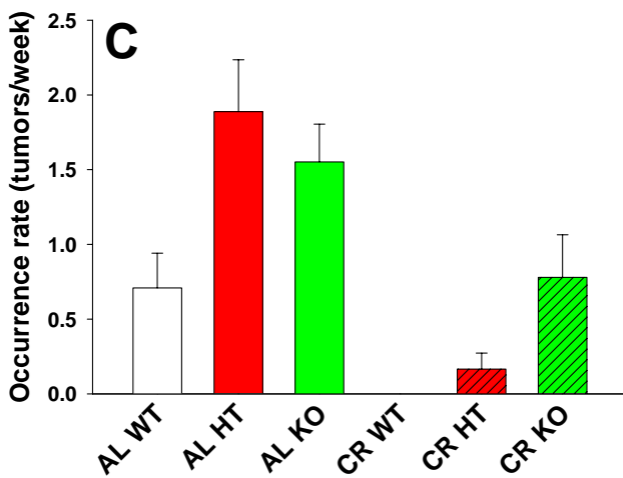

Supplement: supp_0712162105_12162Fig8.pdf [file supp_0712162105_12162Fig8.pdf]

# Females

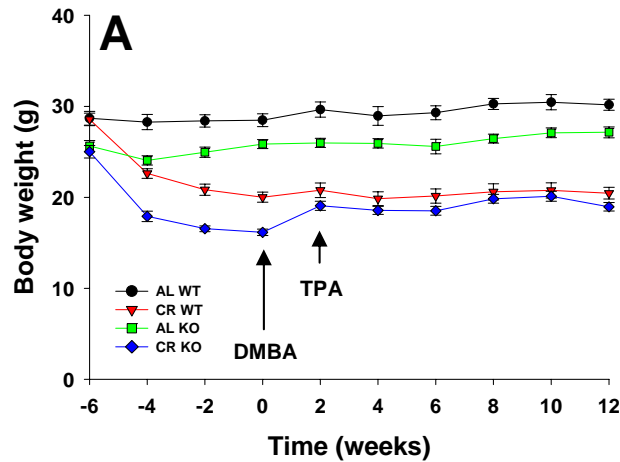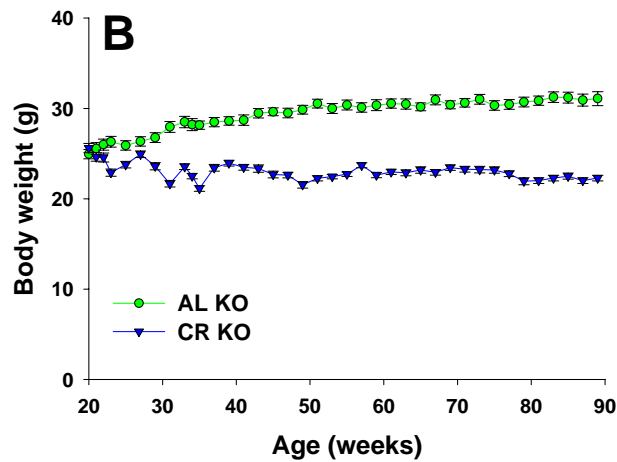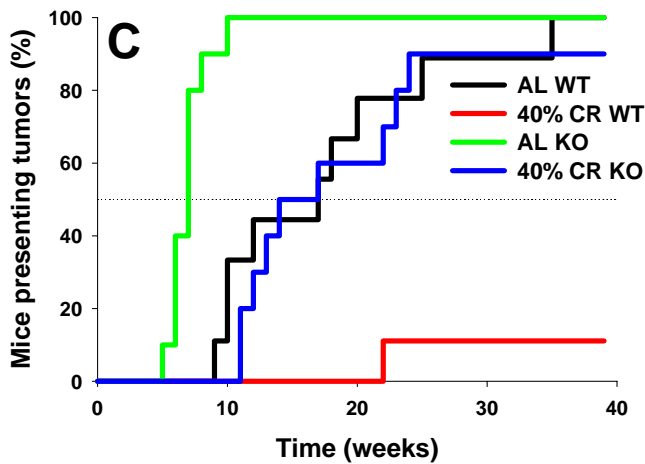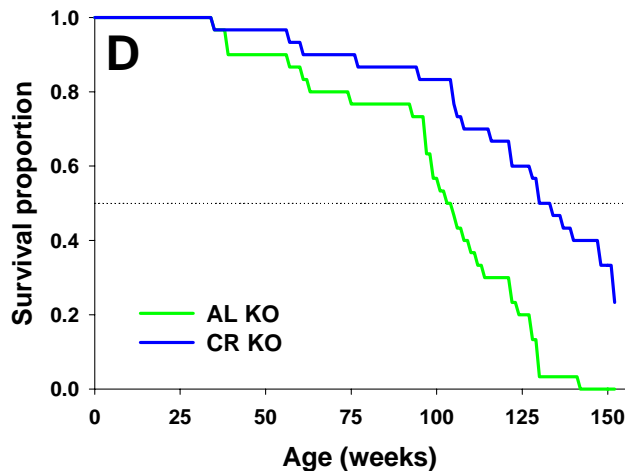

Supplement: supp_0712162105_12162Fig9.pdf [file supp_0712162105_12162Fig9.pdf]
